# Supplementary material
Source: publisher figshare collection journal article supplement (https://karger.figshare.com/articles/dataset/_/18394175)
Supplement: Supplementary file 2 [file 1]

## **Inclusion criteria**

Adults at non-cardioembolic ischaemic stroke or transient ischemia attack

1. Age  $\geq 19$  years
2. Within 3 weeks of ictus
3. TIA with limb weakness and/or dysphasia lasting between 10 minutes and <24 hours with no residual symptoms
  - \* Neuroimaging is not necessary for transient ischaemic attack
4. Ischemic stroke with positive neuroimaging evidence to support the new event

## **Exclusion criteria**

Non-traumatic intracranial hemorrhage within 6 months

Planned surgery or intervention during 4 week follow-up (e.g. carotid endarterectomy)

History of brain tumor

History of bleeding diathesis or coagulopathy

History of aortic stenosis, unstable angina or acute myocardial infarction

History of heart failure (NYHA Class III/IV)

Migraine within 1 month

Participants with intolerance of aspirin or dipyridamole

Participants with definite need for treatment with anticoagulation, or contraindications to antiplatelet agents

Females of childbearing potential, pregnancy or breastfeeding

Haemoglobin less than 8g/dL

Platelet count less than  $100 \times 10^9$  /L

ALT or AST more than 100 IU/L

ALP over 2.5 UNL

Serum total bilirubin over 1.25 UNL

Serum albumin less than 2.5g/dL

Creatinine clearance less than 30 mL/min

Participation in another drug or devices trial concurrently or within 60 days.

Geographical or other factors that may interfere with follow-up

\*Abbreviation: TIA, transient ischemia attack; NYHA, New York Heart Association; ALT, alanine aminotransferase; AST, aspartate aminotransferase; ALP, alkaline phosphatase; UNL, upper normal limit.
